# Supplementary material for: Inhibition of Granule Cell Dispersion and Seizure Development by Astrocyte Elevated Gene-1 in a Mouse Model of Temporal Lobe Epilepsy
Source: MDPI journal article supplement (doi:10.3390/biom14030380), 2024-03-20
Supplement: s1 [file s1]

## Supplementary Materials

### Inhibition of Granule Cell Dispersion and Seizure Development by Astrocyte Elevated Gene-1 in a Mouse Model of Temporal Lobe Epilepsy

#### Supplementary Figures S1 to S8

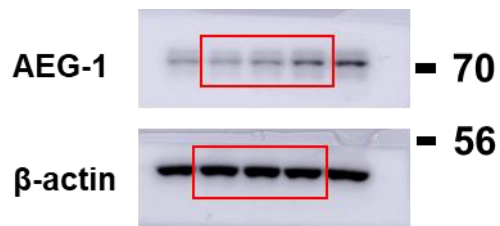

Figure S1. Full-length blots for Figure 1E

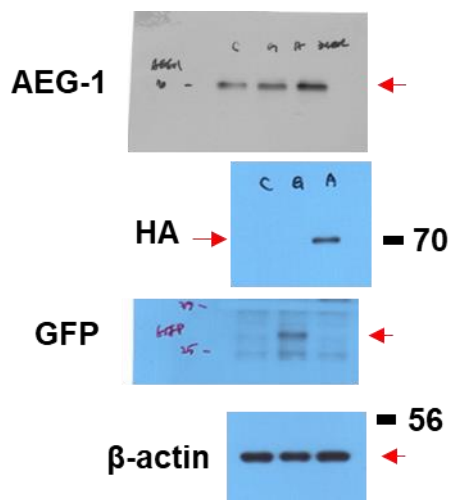

Figure S2. Full-length blots for Figure 2B

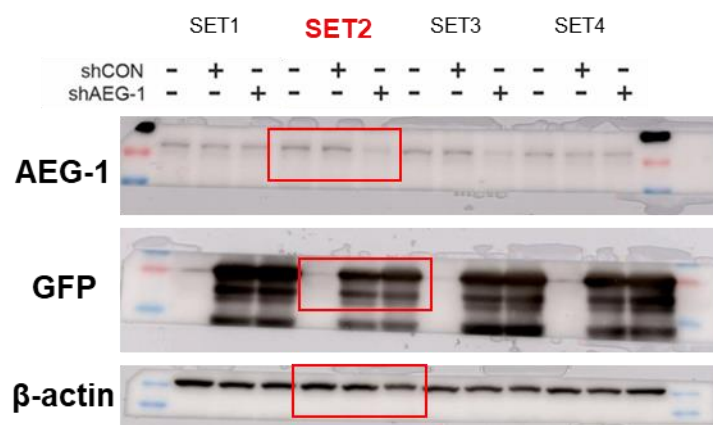

**Figure S3. Full-length blots for Figure 2D**

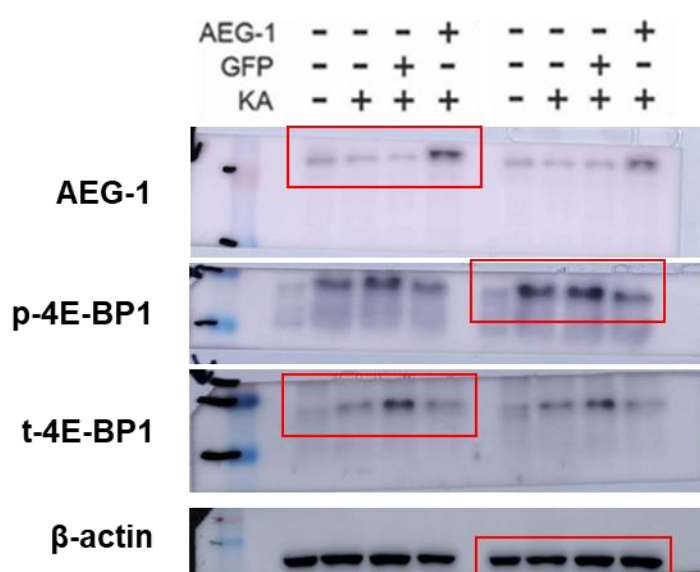

**Figure S4. Full-length blots for Figure 3C**

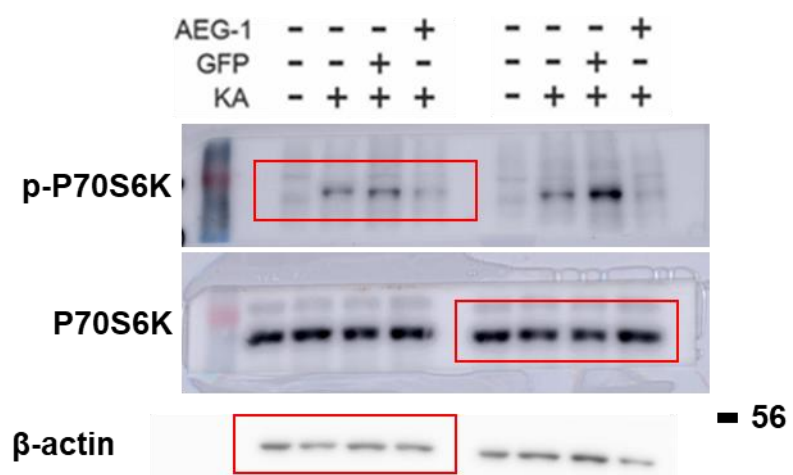

**Figure S5. Full-length blots for Figure 3D**

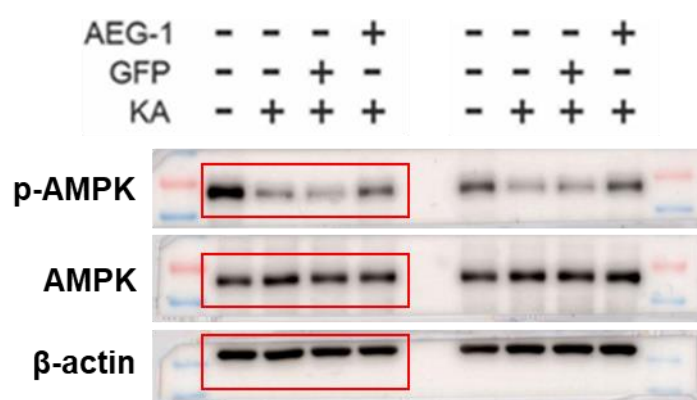

**Figure S6. Full-length blots for Figure 3E**

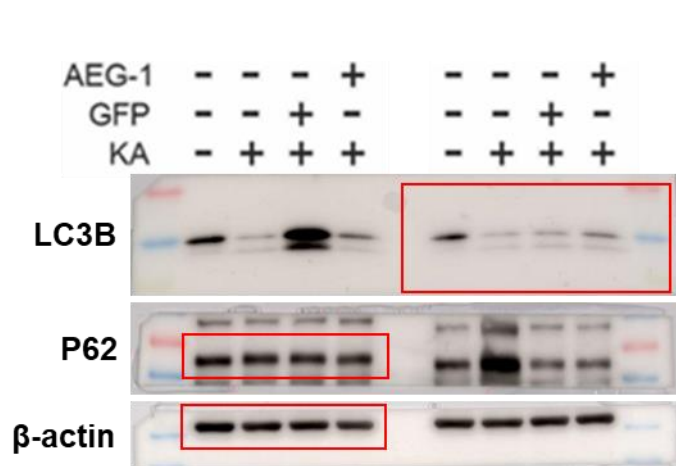

**Figure S7. Full-length blots for Figure 3F**

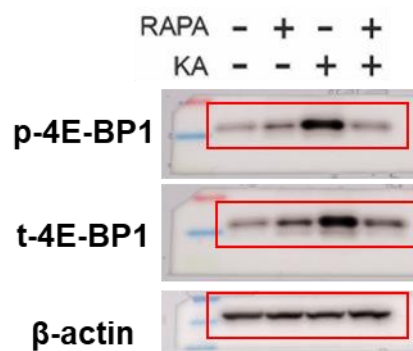

**Figure S8. Full-length blots for Figure 4B**
